# Supplementary material
Source: publisher site journal article supplement (https://www.dovepress.com/article/459290)
Supplement: Supplementary file 1 [file get_supplementary_file.php]

**Supplementary table 1. Assignment table**

| **Variables** |
| --- |
| Age ≥60 years = 1, else =0 |
| Long-term use of glucocorticoid = 1, else =0 |
| BMI <18.5kg/m2 = 1, else =0 |
| Diabetes = 1, else =0 |
| Albumin <30g/L = 1, else =0 |
| Blood urea nitrogen ≥7.14mmol/L = 1, else =0 |
| Procalcitonin>0.5 ng/ml = 1, else =0 |
| Lactic acid >2.2 mmol/L = 1, else =0 |
| PO2/FiO2 <150 mmHg = 1, else =0 |
| CD3+T cells <770 cells/ul = 1, else =0 |
| CD4+T cells <414 cells/ul = 1, else =0 |
| CD8+T cells <238 cells/ul = 1, else =0 |
| Invasive mechanical ventilation = 1, else =0 |
| Vasopressor use = 1, else =0 |
